# Supplementary material for: Applying green chemistry to raw material selection and product formulation at The Estée Lauder Companies
Source: Royal Society of Chemistry journal article supplement (doi:10.1039/d1gc03081g), 2021-12-07
Supplement: d1gc03081g1.pdf [file d1gc03081g1.pdf]

## SUPPORTING INFORMATION

### Applying Green Chemistry to Raw Material Selection and Product Formulation at The Estée Lauder Companies

Matthew J. Eckelman,<sup>1</sup> Matthew S. Moroney,<sup>1</sup> Julie B. Zimmerman,<sup>1</sup> Paul T. Anastas,<sup>1</sup> Eva Thompson,<sup>2</sup> Paul Scott,<sup>2</sup> Maryann McKeever-Alfieri,<sup>2</sup> Paul F. Cavanaugh,<sup>2</sup> George Daher<sup>2</sup>

<sup>1</sup>Sustainability A to Z, LLC, Guilford, CT; <sup>2</sup>Estée Lauder Companies, New York, NY

Corresponding author: Matthew J. Eckelman, [matt@sustainabilityatoz.com](mailto:matt@sustainabilityatoz.com)

#### Contents

**Table S1.** Human Health Scoring Rubric

**Table S2.** Ecosystem Health Scoring Protocol

**Table S3.** Environment Scoring Protocol

**Table S4.** Default Scoring Proxies

**Table S5.** Certainty Score Assignment

**Figure S1.** Number of pure petroleum, mixed, or non-petroleum chemicals for each functional class.

**Figure S2.** Distribution of Green Scores **(A)** at the raw material level by functional class, **(B)** by product category, and **(C)** by product form. Number of observations within each group is listed above the median.

**Figure S3.** Distribution of Green Scores for the product category of lip care by product form.

**Figure S4.** Certainty scores by **(A)** functional class of raw materials, **(B)** product category, and **(C)** product form. Number of observations within each group is listed above the median.

**Table S1.** Human Health Scoring Rubric

| Endpoint description/Source                                                                                                                                                                                                                                                                                                                       | Score | Score assignment rubric                                                                                     |
|---------------------------------------------------------------------------------------------------------------------------------------------------------------------------------------------------------------------------------------------------------------------------------------------------------------------------------------------------|-------|-------------------------------------------------------------------------------------------------------------|
| <b>Acute toxicity:</b> Assesses the inherent lethality hazard via ingestion, inhalation, and dermal absorption exposure routes. The primary data sources are the GHS classification for acute toxicity and the Canada DSL HH priorities classification. If data are present in both the GHS and DSL, the lower (more conservative) score is taken | 1     | Acute toxicity 1 GHS classification OR DSL HH priorities label is “high” or “post 2006”                     |
|                                                                                                                                                                                                                                                                                                                                                   | 2     | Acute toxicity 2 GHS classification OR DSL HH priorities label is “moderate”                                |
|                                                                                                                                                                                                                                                                                                                                                   | 3     | Acute toxicity 3 GHS classification                                                                         |
|                                                                                                                                                                                                                                                                                                                                                   | 4     | Acute toxicity 4 GHS classification OR DSL HH priorities label is “low”                                     |
|                                                                                                                                                                                                                                                                                                                                                   | 5     | No acute toxicity GHS classifications AND no DSL HH priorities label is present                             |
| <b>Ocular toxicity:</b> Assesses the inherent hazard to cause eye damage and/or irritation. The primary data sources are the GHS classifications for eye irritation and eye damage                                                                                                                                                                | 1     | Eye damage GHS classification                                                                               |
|                                                                                                                                                                                                                                                                                                                                                   | 3     | Eye irritation GHS classification                                                                           |
|                                                                                                                                                                                                                                                                                                                                                   | 5     | No eye damage or eye irritation GHS classifications present                                                 |
| <b>Dermal toxicity:</b> Assesses the inherent hazard to cause dermal corrosion, irritation, and/or sensitization. The primary data sources are the GHS classifications for skin corrosion, skin irritation, skin mild irritation, and skin sensitization                                                                                          | 1     | Skin sensitization 1A OR any skin corrosion GHS classification                                              |
|                                                                                                                                                                                                                                                                                                                                                   | 2     | Any skin irritation GHS classification                                                                      |
|                                                                                                                                                                                                                                                                                                                                                   | 3     | Skin sensitization 1B or skin sensitization 1 GHS classification                                            |
|                                                                                                                                                                                                                                                                                                                                                   | 4     | Skin mild irritation GHS classification                                                                     |
|                                                                                                                                                                                                                                                                                                                                                   | 5     | No skin corrosion, skin irritation, skin mild irritation, or skin sensitization GHS classifications present |

DSL, Domestic Substance List; GHS, Globally Harmonized System of Classification and Labelling of Chemicals; HH, human health.

**Table S2.** Ecosystem Health Scoring Protocol

| Endpoint description/Source                                                                                                                                                                                                                                                                                                                                                                                                      | Score | Score assignment rubric                                                                                             |
|----------------------------------------------------------------------------------------------------------------------------------------------------------------------------------------------------------------------------------------------------------------------------------------------------------------------------------------------------------------------------------------------------------------------------------|-------|---------------------------------------------------------------------------------------------------------------------|
| <b>Bioaccumulation:</b> Assesses the propensity to bioaccumulate up the food chain when free in the environment. The primary data source is the Canada DSL bioaccumulation classification. The secondary data source is the component's feedstock sourcing data, as provided by the raw material supplier to ELC                                                                                                                 | 1     | DSL bioaccumulation label is "yes"                                                                                  |
|                                                                                                                                                                                                                                                                                                                                                                                                                                  | 2     | DSL bioaccumulation label is blank                                                                                  |
|                                                                                                                                                                                                                                                                                                                                                                                                                                  | 3     | DSL bioaccumulation label is "uncertain"                                                                            |
|                                                                                                                                                                                                                                                                                                                                                                                                                                  | 4     | Component is not listed in the DSL, and feedstock source is wholly biological or mineral                            |
|                                                                                                                                                                                                                                                                                                                                                                                                                                  | 5     | DSL bioaccumulation label is "no"                                                                                   |
| <b>Persistence:</b> Assesses the propensity to persist (i.e., not break down or biodegrade) when free in the environment. The primary data source is the Canada DSL persistence classification. The secondary data source is the component's feedstock sourcing data, as provided by the raw material supplier to ELC                                                                                                            | 1     | DSL persistence label is "yes"                                                                                      |
|                                                                                                                                                                                                                                                                                                                                                                                                                                  | 2     | DSL persistence label is blank                                                                                      |
|                                                                                                                                                                                                                                                                                                                                                                                                                                  | 3     | DSL persistence label is "uncertain"                                                                                |
|                                                                                                                                                                                                                                                                                                                                                                                                                                  | 4     | Component is not listed in the DSL, and feedstock source is wholly biological or mineral                            |
|                                                                                                                                                                                                                                                                                                                                                                                                                                  | 5     | DSL persistence label is "no"                                                                                       |
| <b>Aquatic toxicity:</b> Assesses the inherent hazard in the aquatic environment, both acutely and chronically. The primary data sources are the GHS classifications for aquatic acute toxicity and aquatic chronic toxicity, along with the DSL inherently toxic to aquatic organisms classification. The more conservative score is taken. If no information is present in the DSL database, it is scored according to the GHS | 1     | Aquatic acute 1 or aquatic chronic 1 GHS classification OR DSL inherently toxic to aquatic organisms label is "yes" |
|                                                                                                                                                                                                                                                                                                                                                                                                                                  | 2     | Aquatic chronic 2 GHS classification OR DSL inherently toxic to aquatic organisms label is blank                    |
|                                                                                                                                                                                                                                                                                                                                                                                                                                  | 3     | Aquatic chronic 3 GHS classification OR DSL inherently toxic to aquatic organisms label is "uncertain"              |
|                                                                                                                                                                                                                                                                                                                                                                                                                                  | 4     | Aquatic chronic 4 GHS classification                                                                                |
|                                                                                                                                                                                                                                                                                                                                                                                                                                  | 5     | No aquatic acute or aquatic chronic GHS classifications AND DSL inherently toxic to aquatic organisms label is "no" |

DSL, Domestic Substance List; ELC, Estée Lauder Companies; GHS, Globally Harmonized System of Classification and Labelling of Chemicals.

**Table S3.** Environment Scoring Protocol

| Endpoint description/Source                                                                                                                                                                                                                                                                                                                                                                                                                                                                                                    | Score                    | Score assignment rubric                                                                          |
|--------------------------------------------------------------------------------------------------------------------------------------------------------------------------------------------------------------------------------------------------------------------------------------------------------------------------------------------------------------------------------------------------------------------------------------------------------------------------------------------------------------------------------|--------------------------|--------------------------------------------------------------------------------------------------|
| <b>Feedstock sourcing:</b> Assesses for ingredient's environmental impact of sourcing, degree of supply chain transparency, and whether it has a third-party sustainability certification. All data are obtained from ELC suppliers. Three independent submetrics are added to score this metric:<br>- Ingredient composition: Assesses for % of petroleum-derived content<br>- Ingredient geography: Assesses for sourcing transparency<br>- Certifications: Assesses for any RSPO or organic certifications                  | 1                        | Ingredient source is wholly of petroleum origin                                                  |
|                                                                                                                                                                                                                                                                                                                                                                                                                                                                                                                                | 2                        | Ingredient source is partially of petroleum origin and partially of biological or mineral origin |
|                                                                                                                                                                                                                                                                                                                                                                                                                                                                                                                                | 3                        | Ingredient source is wholly of biological or mineral origin                                      |
|                                                                                                                                                                                                                                                                                                                                                                                                                                                                                                                                | +1 Point                 | All ingredient components have an associated country of origin                                   |
|                                                                                                                                                                                                                                                                                                                                                                                                                                                                                                                                | +1 Point                 | Ingredient is RSPO certified (e.g., mass balance) or certified organic (USDA or COSMOS)          |
| <b>GHG emissions:</b> Assesses ingredient's GHG impact. Calculated by averaging 2 independent submetrics:<br>- GHG supplier emissions: Scopes 1 & 2 emissions effect per kilogram of product, as provided by ELC suppliers<br>- GHG modelled emissions: Scopes 1, 2 & 3 emissions effect of each ingredient component, as obtained from the ecoinvent 3 database, per the component chemical classification. The ingredient GHG modelled emissions score is calculated via the mass-weighted average of its components' scores | 1                        | GHG supplier value/modelled emissions factor is >1000                                            |
|                                                                                                                                                                                                                                                                                                                                                                                                                                                                                                                                | 2                        | GHG supplier emissions: No GHG emissions information is provided by the supplier                 |
|                                                                                                                                                                                                                                                                                                                                                                                                                                                                                                                                | 5 – $[\log_{10}(x) + 1]$ | GHG supplier value/modelled emissions factor (x) is >0.1 but <1000                               |
|                                                                                                                                                                                                                                                                                                                                                                                                                                                                                                                                | 5                        | GHG supplier value/modelled emissions factor is <0.1                                             |

COSMOS, COSMetic Organic and Natural Standard; ELC, Estée Lauder Companies; GHG, greenhouse gas; RSPO, Roundtable on Sustainable Palm Oil; USDA, US Department of Agriculture.

**Table S4.** Default Scoring Proxies

| <b>Default type</b> | <b>Acute toxicity</b> | <b>Ocular toxicity</b> | <b>Dermal toxicity</b> | <b>Bioaccumulation</b> | <b>Persistence</b> | <b>Aquatic toxicity</b> |
|---------------------|-----------------------|------------------------|------------------------|------------------------|--------------------|-------------------------|
| Biological          | 5                     | 3                      | 3                      | 4                      | 4                  | 5                       |
| Mineral             | 3                     | 3                      | 3                      | 4                      | 4                  | 3                       |
| Fluoro compound     | 2                     | 2                      | 2                      | 3                      | 1                  | 2                       |
| Colorant            | 5                     | 3                      | 3                      | 3                      | 2                  | 2                       |
| Polymer             | 4                     | 3                      | 3                      | 5                      | 1                  | 4                       |
| Siloxane/Silicone   | 4                     | 2                      | 2                      | 5                      | 1                  | 4                       |
| Natural metabolite  | 4                     | 4                      | 4                      | 5                      | 5                  | 4                       |
| Petroleum           | 2                     | 2                      | 2                      | 3                      | 3                  | 2                       |
| Unknown             | 3                     | 3                      | 3                      | 3                      | 3                  | 3                       |

**Table S5.** Certainty Score Assignment

| <b>Endpoint</b>              | <b>Score</b> | <b>Score assignment</b>  |
|------------------------------|--------------|--------------------------|
| All HH and ECO endpoints     | 2            | From default data value  |
|                              | 3            | From proxy data value    |
|                              | 5            | From GHS or DSL data     |
| ENV feedstock sourcing       | 3            | All raw materials        |
| ENV greenhouse gas emissions | 2            | From default data value  |
|                              | 4            | From individual chemical |

DSL, Domestic Substance List; ECO, ecosystem health; ENV, environment; GHS, Globally Harmonized System of Classification and Labelling of Chemicals; HH, human health.

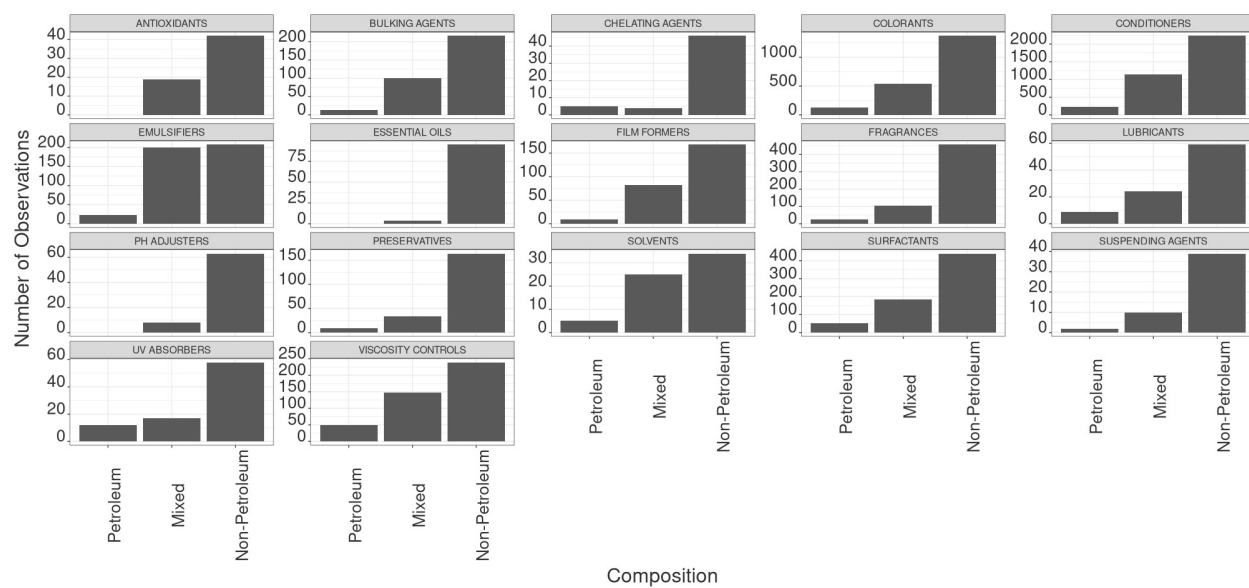

**Figure S1.** Number of pure petroleum, mixed, or non-petroleum chemicals for each functional class.

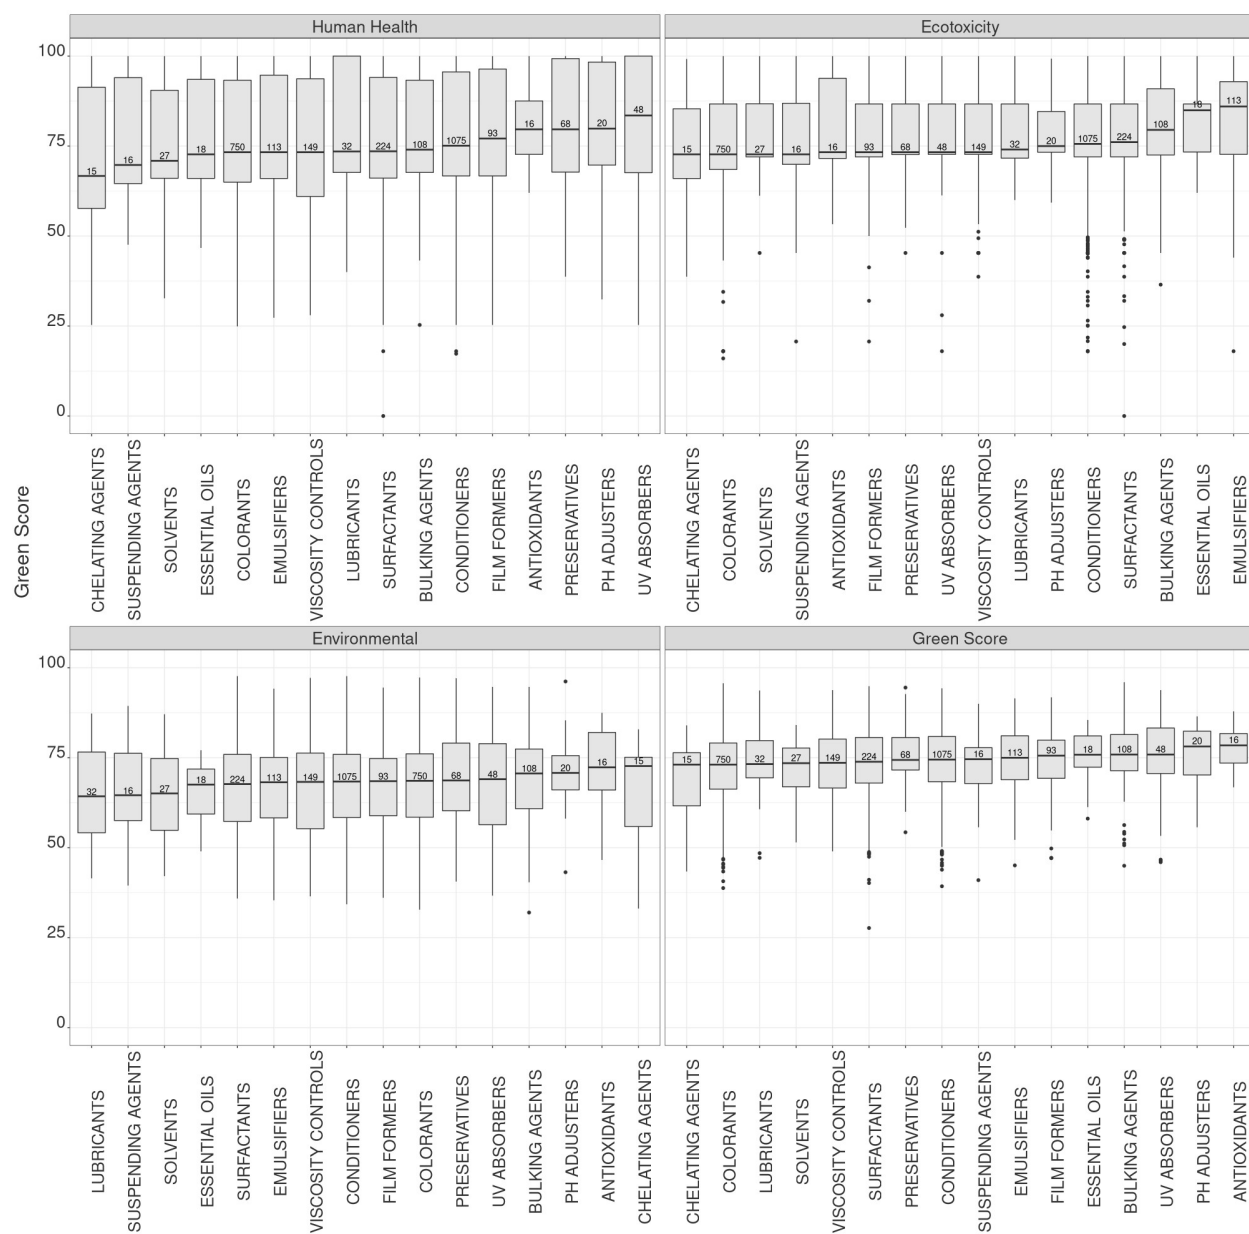



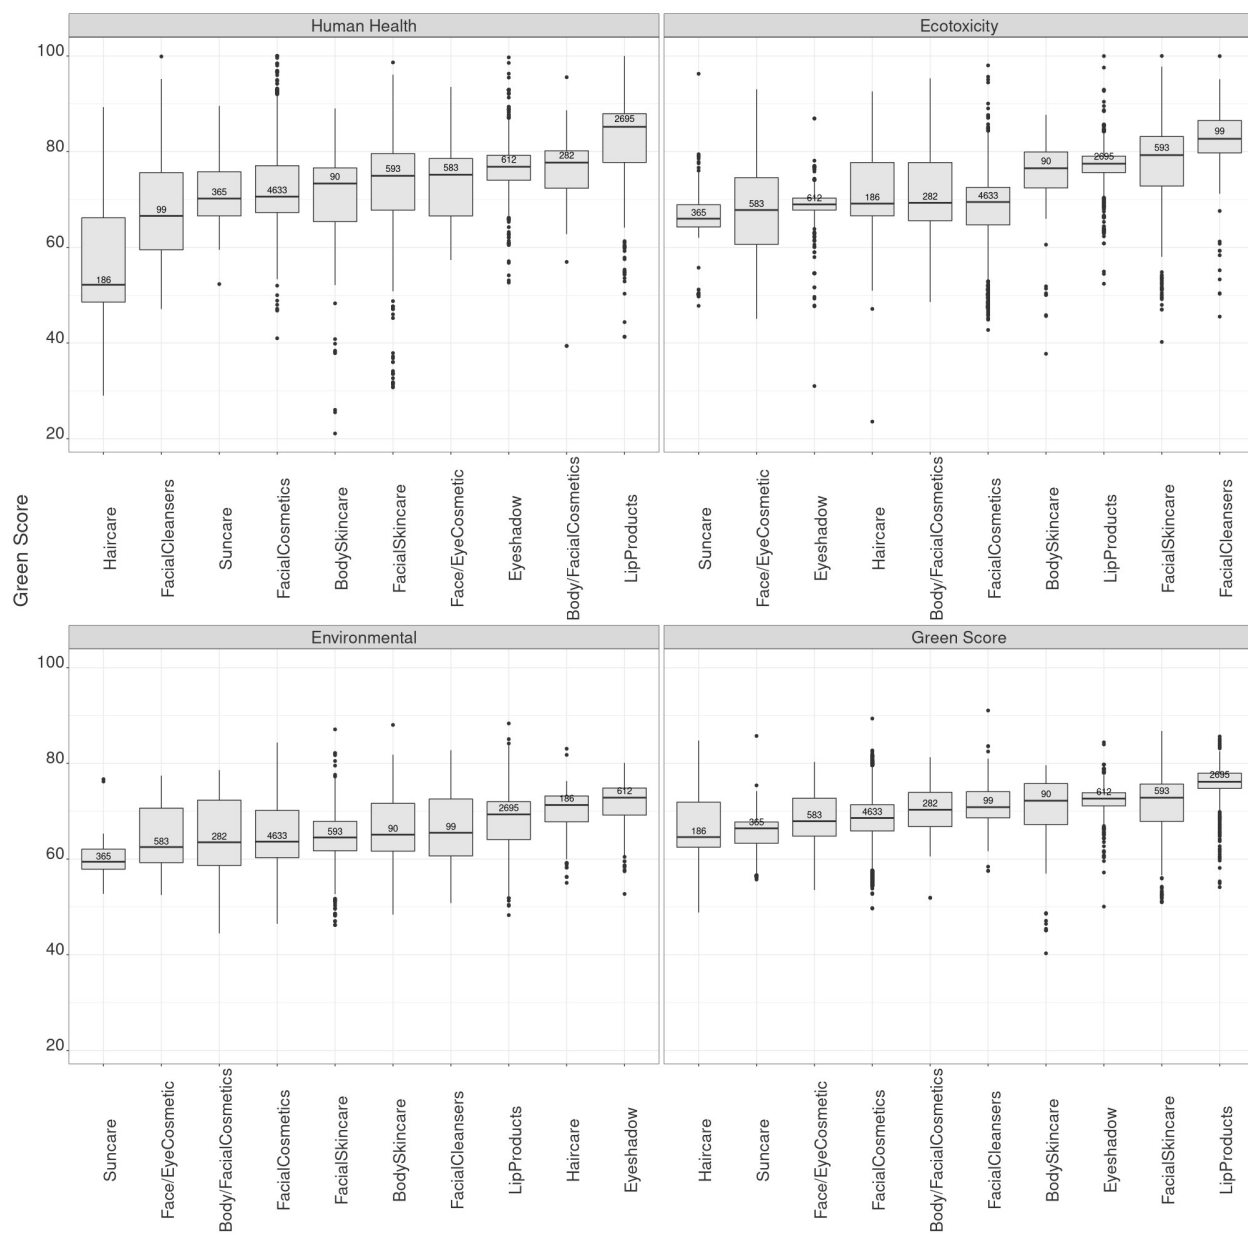

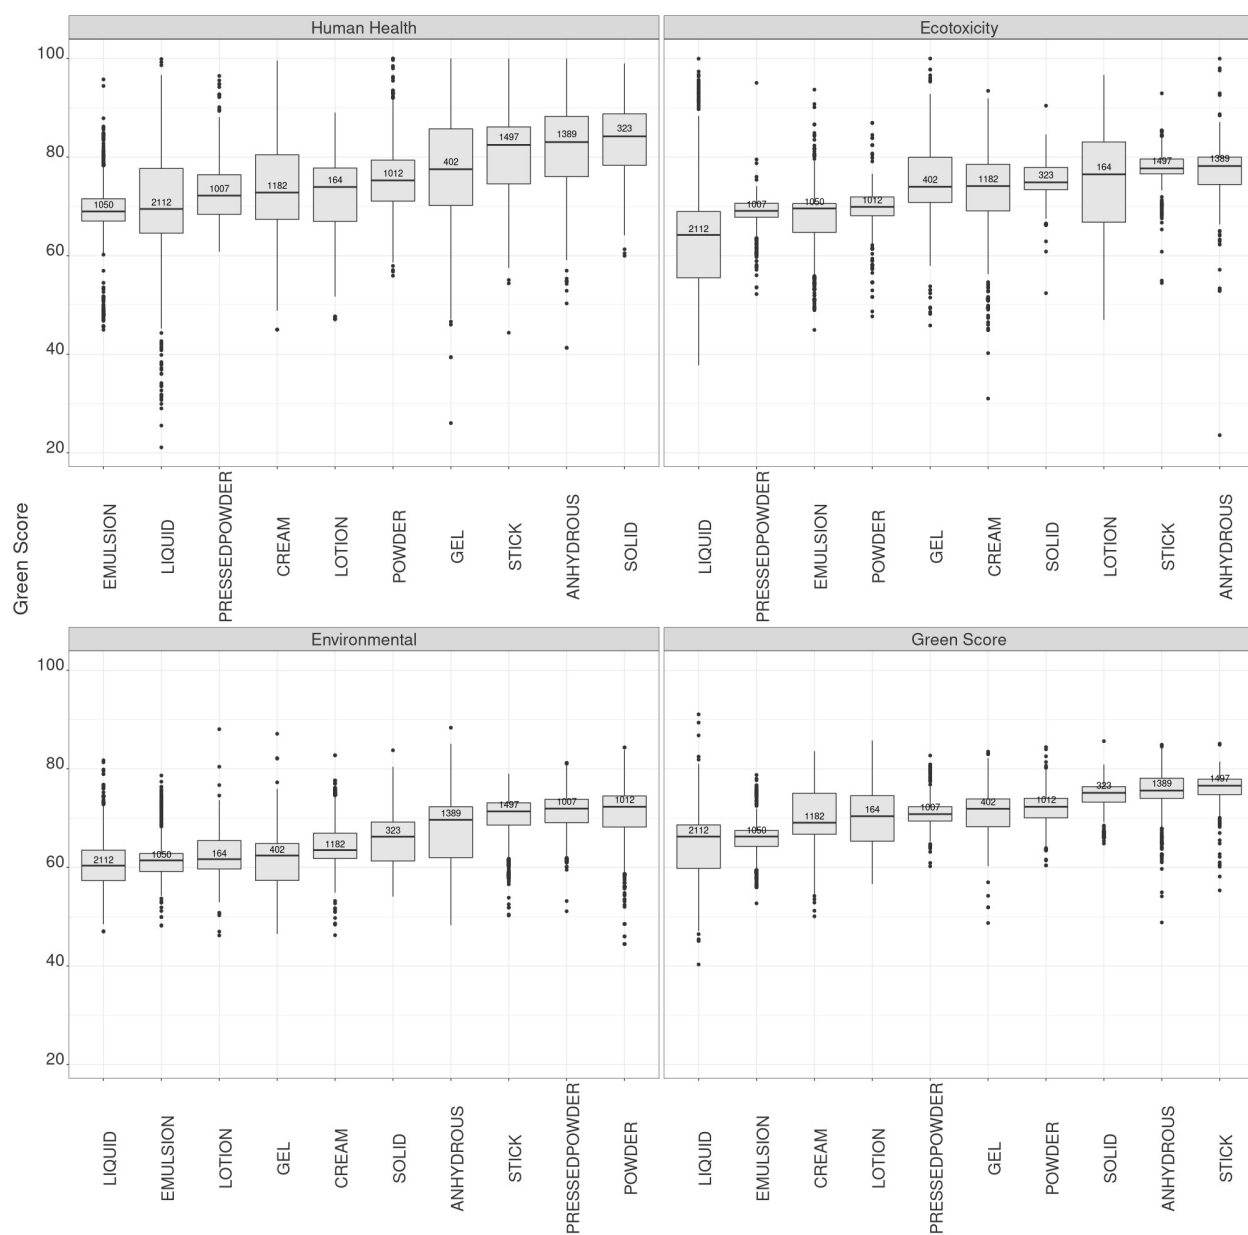

**Figure S2.** Distribution of Green Scores **(A)** at the raw material level by functional class, **(B)** by product category, and **(C)** by product form. Number of observations within each group is listed above the median.

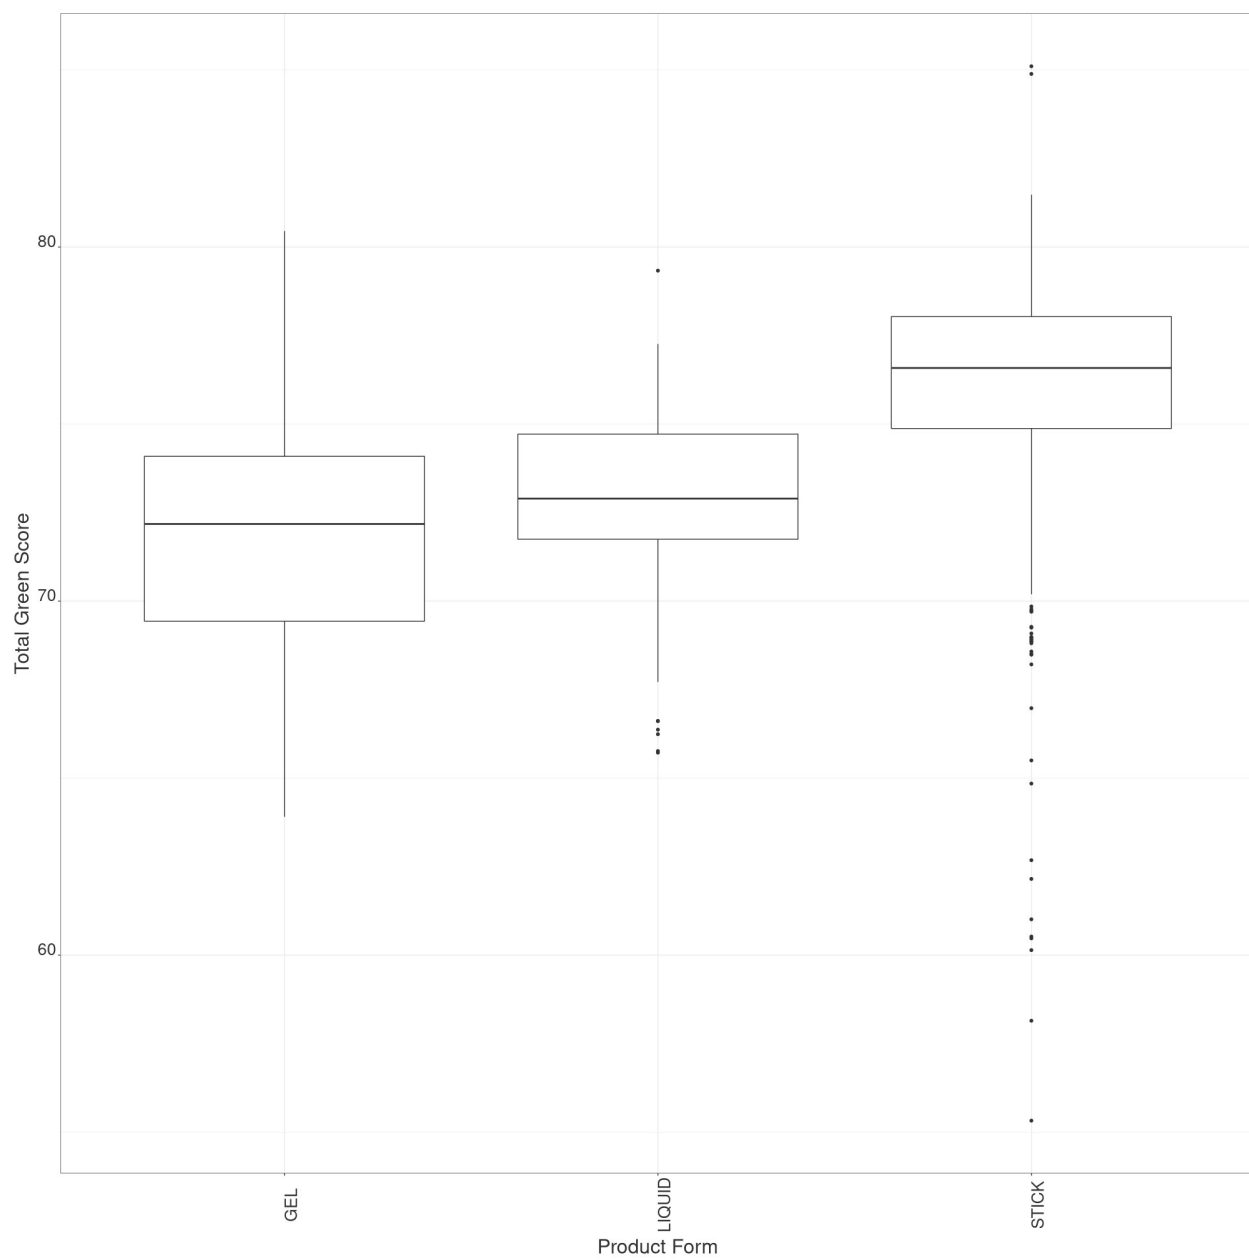

**Figure S3.** Distribution of Green Scores for the product category of lip care by product form.

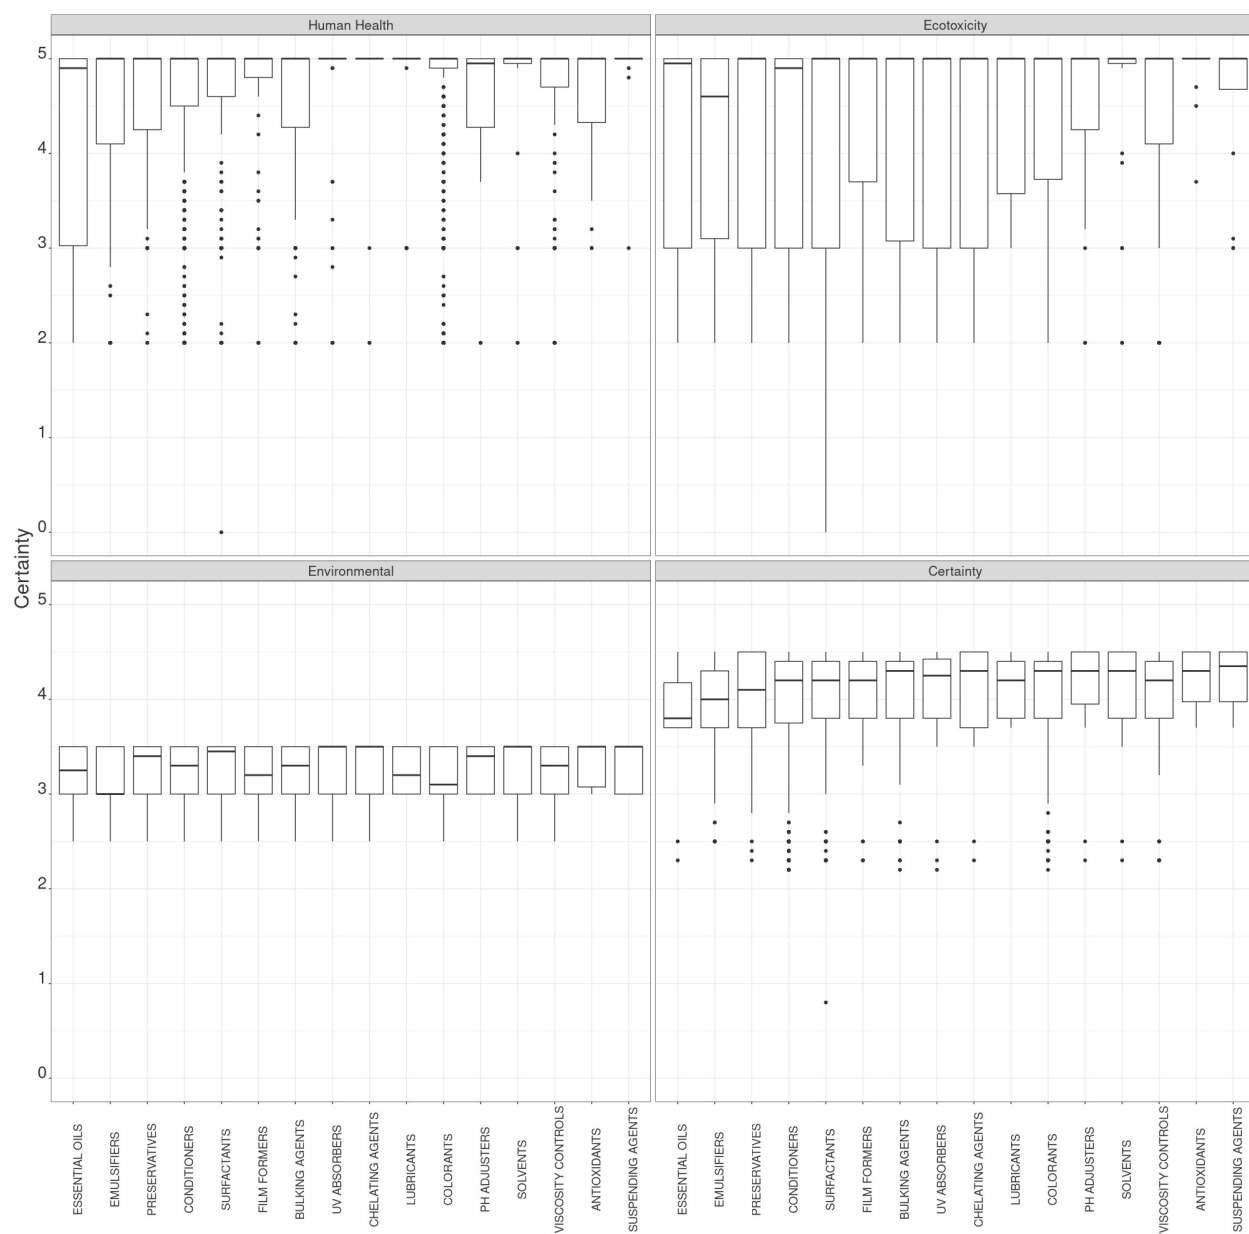

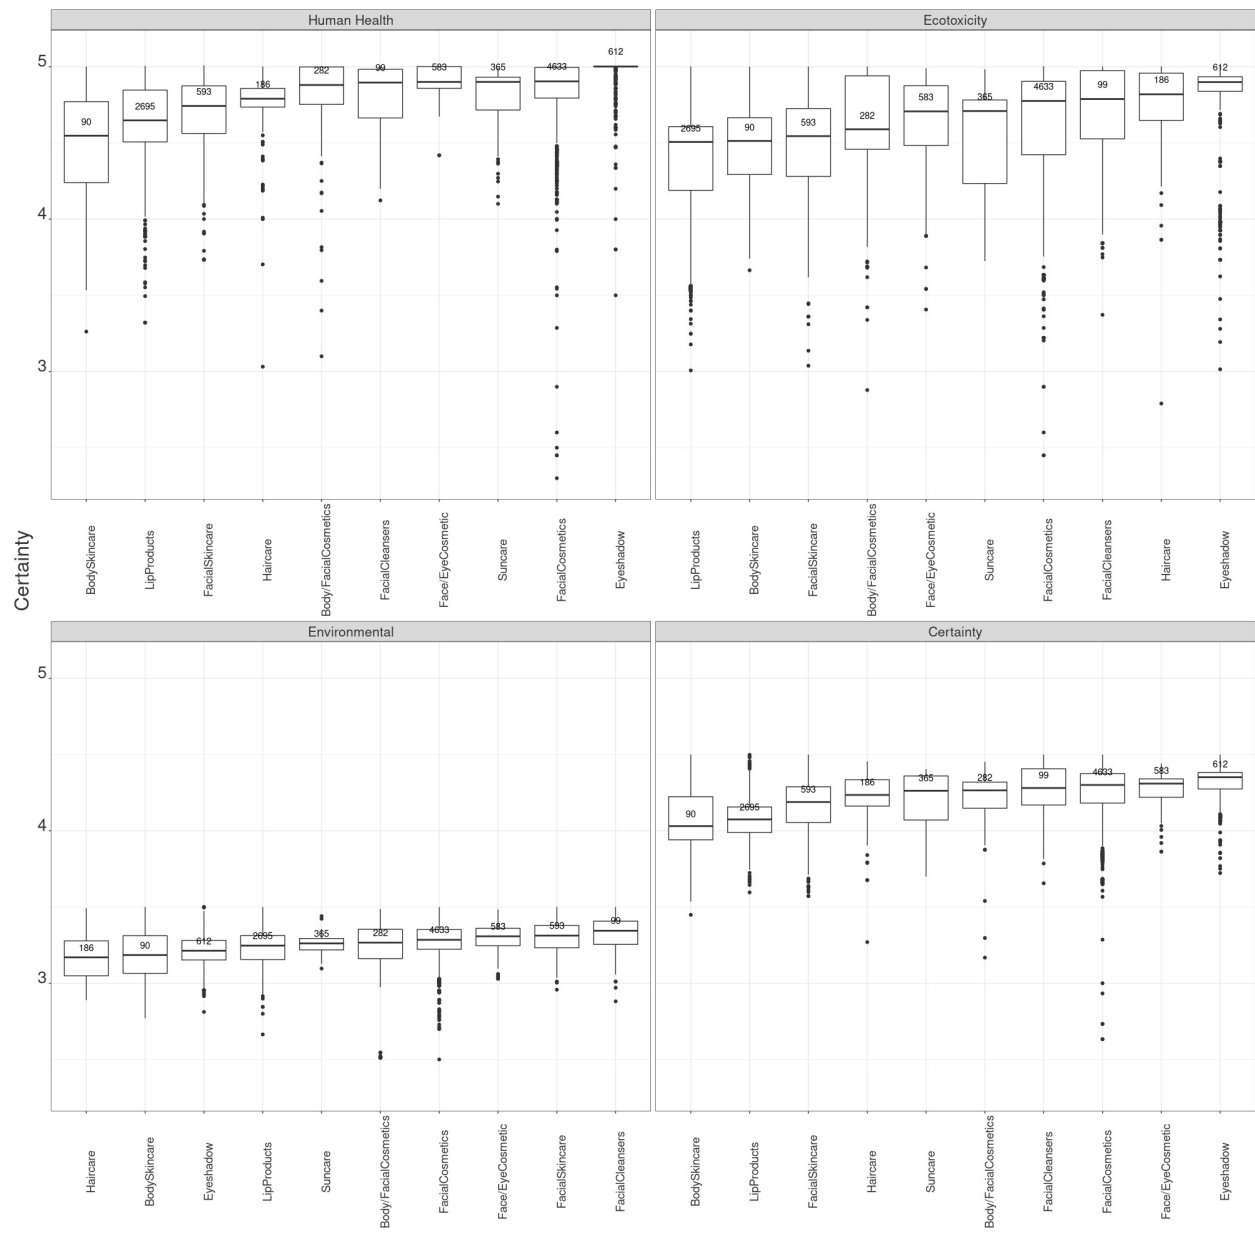

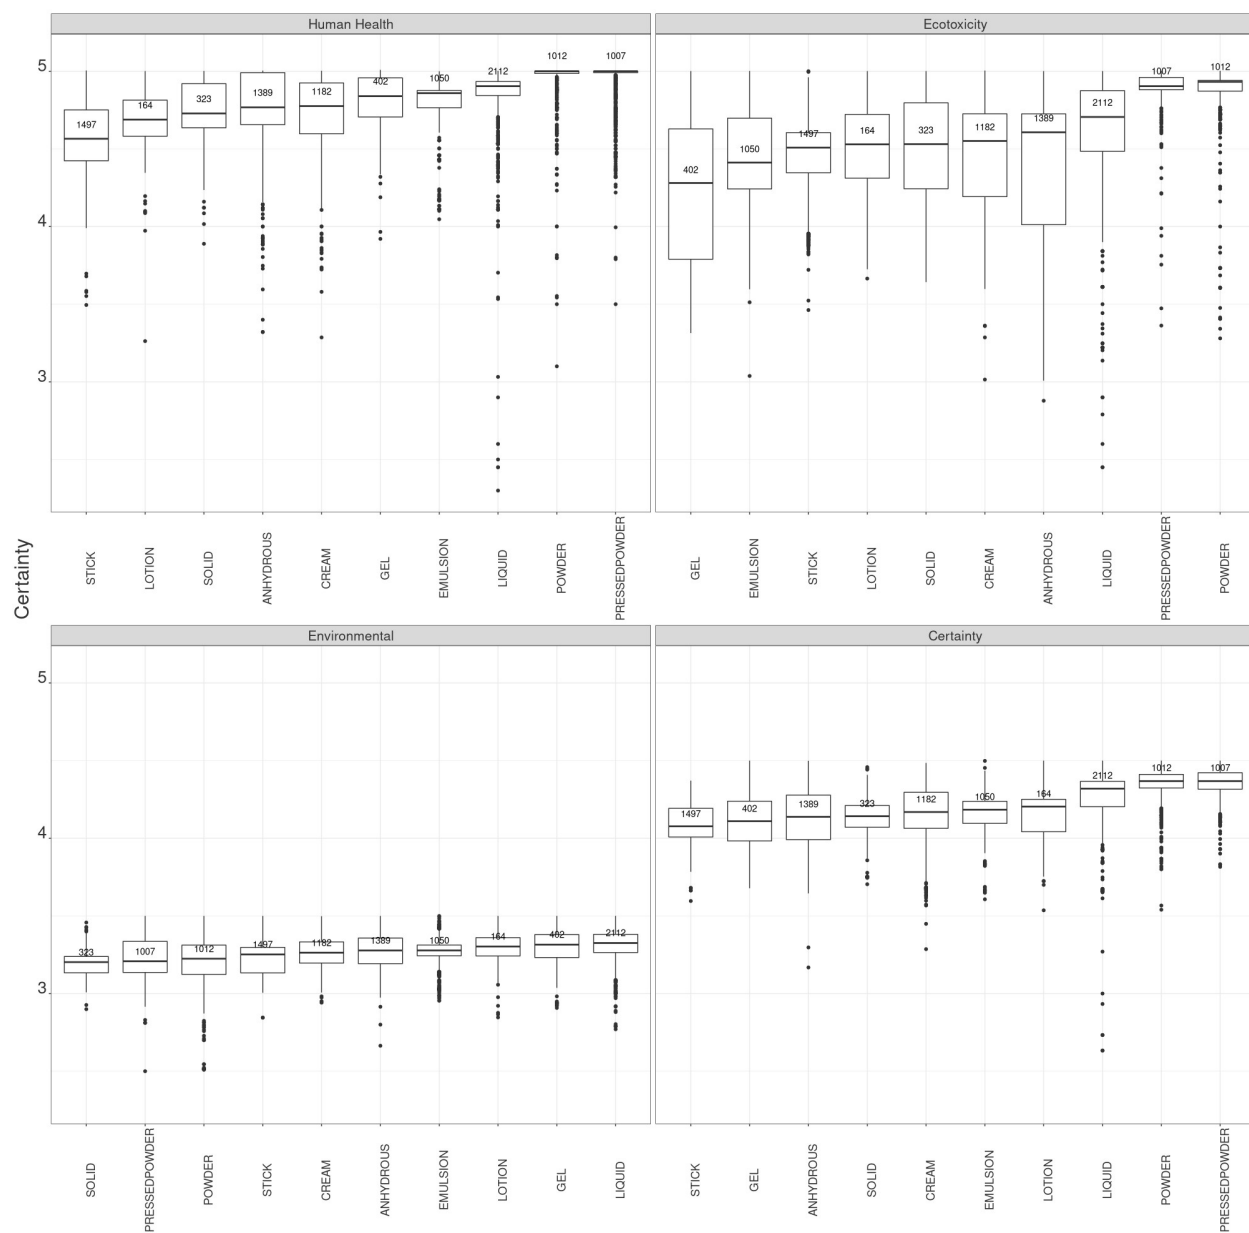

**Figure S4.** Certainty scores by (A) functional class of raw materials, (B) product category, and (C) product form. Number of observations within each group is listed above the median.
